# Supplementary material for: Efficiency of Recombinant CRISPR/rCas9-Mediated miRNA Gene Editing in Rice
Source: PubMed Central journal article supplement (PMC7766165; doi:10.3390/ijms21249606), 2020-12-16
Supplement: ijms-21-09606-s001.pdf [file ijms-21-09606-s001.pdf]

**Table S1.** The primer list used in this study

| Genes                      | Forward primer                                     | Reverse primer                                           | Experiments                          |                                                 |
|----------------------------|----------------------------------------------------|----------------------------------------------------------|--------------------------------------|-------------------------------------------------|
| <i>OsU3 pro(HindIII) F</i> | ① <u>AAGCTTAAGGAATCTTTAAACATACGA</u>               |                                                          |                                      |                                                 |
| <i>gRNA ter (XbaI) R</i>   | ④ <u>TCTAGAAAAACAAAAAGCACCCGACTCGGTGC</u>          |                                                          |                                      |                                                 |
| <i>miR399d</i>             | ③ <u>TCACAAAAACGGCCTGCCAAGTTTTAGAGCTAGAAATAGC</u>  | ② <u>TTGGCAGGCCGTTTTTGSTGAGCCACGGATCATCTGCA</u>          |                                      |                                                 |
| <i>miR418</i>              | ③ <u>AATTCACCCGTGGTCCCTGGSTTTTAGAGCTAGAAATAGC</u>  | ② <u>CCAGGGACCACGGTGGAAATGCCACGGATCATCTGCA</u>           |                                      |                                                 |
| <i>miR156d</i>             | ③ <u>AGAGTGAGCACACGGCGTGAGTTTTAGAGCTAGAAATAGC</u>  | ② <u>TCACGCCGTGTGCTCACTCTGCCACGGATCATCTGCA</u>           |                                      |                                                 |
| <i>miR399e</i>             | ③ <u>TGCCACGAATGCAAACTTTGTTTTAGAGCTAGAAATAGC</u>   | ② <u>CAAAGTTGCATTGCTGGGCACGCCACGGATCATCTGCA</u>          |                                      |                                                 |
| <i>miR399i</i>             | ③ <u>TGCTAGCCTTTCCTCGCCAAGTTTTAGAGCTAGAAATAGC</u>  | ② <u>TTGGCAGGAAAGGCTAGCAGCCACGGATCATCTGCA</u>            |                                      |                                                 |
| <i>miR169f</i>             | ③ <u>AAGAGCTGATTCGGTAGCCAGTTTTAGAGCTAGAAATAGC</u>  | ② <u>TGGCTACCGAATCAGCTCTTGCCACGGATCATCTGCA</u>           | For construction of CR<br>ISPR/rCas9 |                                                 |
| <i>miR171f</i>             | ③ <u>TTGGCATGGTTCATCAAACTTTTAGAGCTAGAAATAGC</u>    | ② <u>GTTTGATTGAACCATGCCAAGCCACGGATCATCTGCA</u>           |                                      |                                                 |
| <i>OsNAC14</i>             | ③ <u>AAGAGCTCTGGTGCAGRAAGSTTTTAGAGCTAGAAATAGC</u>  | ② <u>GTTCTTGCAACAGAGCTCTTGCCACGGATCATCTGCA</u>           |                                      |                                                 |
| <i>miR156g</i>             | ③ <u>GAAGAGAGTGAGCACACAGCSTTTTAGAGCTAGAAATAGC</u>  | ② <u>GCTGTGTGCTCACTCTCTTGCCACGGATCATCTGCA</u>            |                                      |                                                 |
| <i>miR399k</i>             | ③ <u>GGTTACCAGACTACTGCCAAGTTTTAGAGCTAGAAATAGC</u>  | ② <u>TTGGCAGTAGTCTGGTAAACGCCACGGATCATCTGCA</u>           |                                      |                                                 |
| <i>miR818b</i>             | ③ <u>ATATTTATGGGACGGAGGGATGTTTTAGAGCTAGAAATAGC</u> | ② <u>ATCCCTCCGTCCCATATAATGSCACGGATCATCTGCA</u>           |                                      |                                                 |
| <i>miR814a</i>             | ③ <u>ACTTCATAGTACAACGAATCGTTTTAGAGCTAGAAATAGC</u>  | ② <u>GATTCGTTGTACTATGAAGTGCCACGGATCATCTGCA</u>           |                                      |                                                 |
| <i>miR816</i>              | ③ <u>ATATTTACTACAACGAATCGTTTTAGAGCTAGAAATAGC</u>   | ② <u>GATTCGTTGTAGTAAAATATGCCACGGATCATCTGCA</u>           |                                      |                                                 |
| <i>miR399d</i>             | (CACC) GCACAAGAGGCACACTAC                          | GTTGCCGCCAGACTTCGTTTAC                                   |                                      | Genomic DNA PCR<br>TA Cloning<br>PCR sequencing |
| <i>miR418</i>              | (CACC) GGGTCACGGAAAAGGTC                           | GTGGGGATAACGATATTGGACCC                                  |                                      |                                                 |
| <i>miR156d</i>             | (CACC) GCTGAATTTCTCTGTACCAAAG                      | CCGCTCACCGGATCCAAAGAAG                                   |                                      |                                                 |
| <i>miR399e</i>             | (CACC) GGTGGAAGAGGAGGAG                            | GTCCAAAACACATATACAGGAACC                                 |                                      |                                                 |
| <i>miR399i</i>             | (CACC) GCTGCTCAAGCATTTGTCAG                        | GTACACCCCTCAGGCCCTTAAGTC                                 |                                      |                                                 |
| <i>miR169f</i>             | (CACC) CGTTGCAATCCATGGACATC                        | GGGGAGATATGGGTATCTAGGAC                                  |                                      |                                                 |
| <i>miR171f</i>             | (CACC) GTTTCGCTTCCCATGTC                           | GGCAGGCATGTGAAATAACACGC                                  |                                      |                                                 |
| <i>OsNAC14</i>             | (CACC) CCTCCGACGAGCTTGTCTGTG                       | CGGGTAACGCATGATTTGGGG                                    |                                      |                                                 |
| <i>miR156g</i>             | (CACC) GAGACCTCCCCAGATCTGG                         | TGAGGAGGACAGTAGTAGCCG                                    |                                      |                                                 |
| <i>miR399k</i>             | (CACC) AGAAAGGCCGTGTAGCTG                          | AGATTGCTCTCTCCCAATTCCTC                                  |                                      |                                                 |
| <i>miR818b</i>             | (CACC) GATCGATCTCGTCGTG                            | GAACCTTGCAATGACTTCAGCTAG                                 |                                      |                                                 |
| <i>miR814a</i>             | (CACC) TTTCTGCCAGTGTCTCTAGC                        | CCCTCTGTGGTTTTAAGGGCAG                                   |                                      |                                                 |
| <i>miR816</i>              | (CACC) GATTCTGTACTACTAGAACGTC                      | GGCTGGCAGTGGCTCAGATC                                     |                                      |                                                 |
| <i>Universal_R</i>         | GTGCAGGTTCCGAGGT                                   |                                                          | Stem-loop RT-PCR                     |                                                 |
| <i>miR171f-5p_RT</i>       | GCGCCGGTGTGGCATGGTTCAATC                           | GTCGTATCCAGTGCAGGGTCCGAGGTATTGCACTGGATACGAATTTGATTTG     |                                      |                                                 |
| <i>MiR818b_RT</i>          | GCGCCGGAATCCCTTATATTATGGG                          | GTCGTATCCAGTGCAGGGTCCGAGGTATTGCACTGGATACGAACCCGTCCTCCATA |                                      |                                                 |

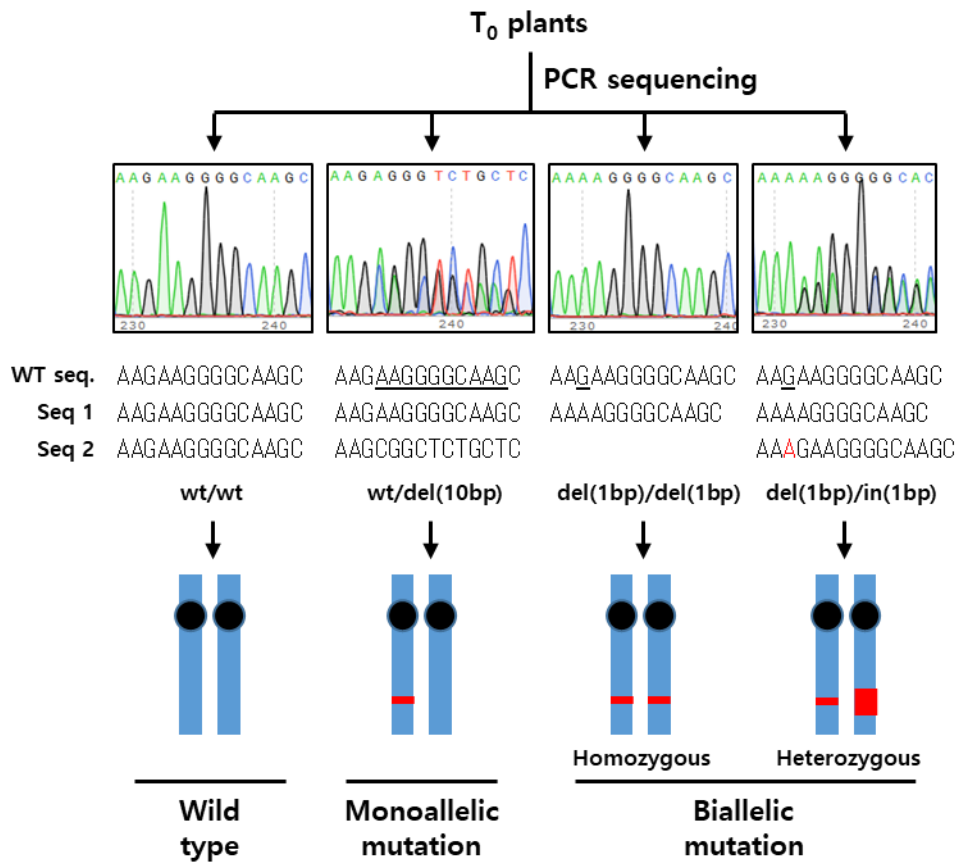

**Figure S1.** Determination of mutation types from PCR products. Genomic DNA extracted from T<sub>0</sub> transgenic plants was used for PCR-amplification of the single guide RNA (sgRNA) targeting site. The PCR products were analyzed by the Sanger sequencing method, and resultant chromatograms were used for the determination of mutation types. Wild type, non-mutated transgenic plants; Monoallelic mutation, one allele is mutated; Biallelic mutation, the two alleles are mutated; Homozygous, the two alleles have the same mutations; Heterozygous, the two alleles have different mutations.

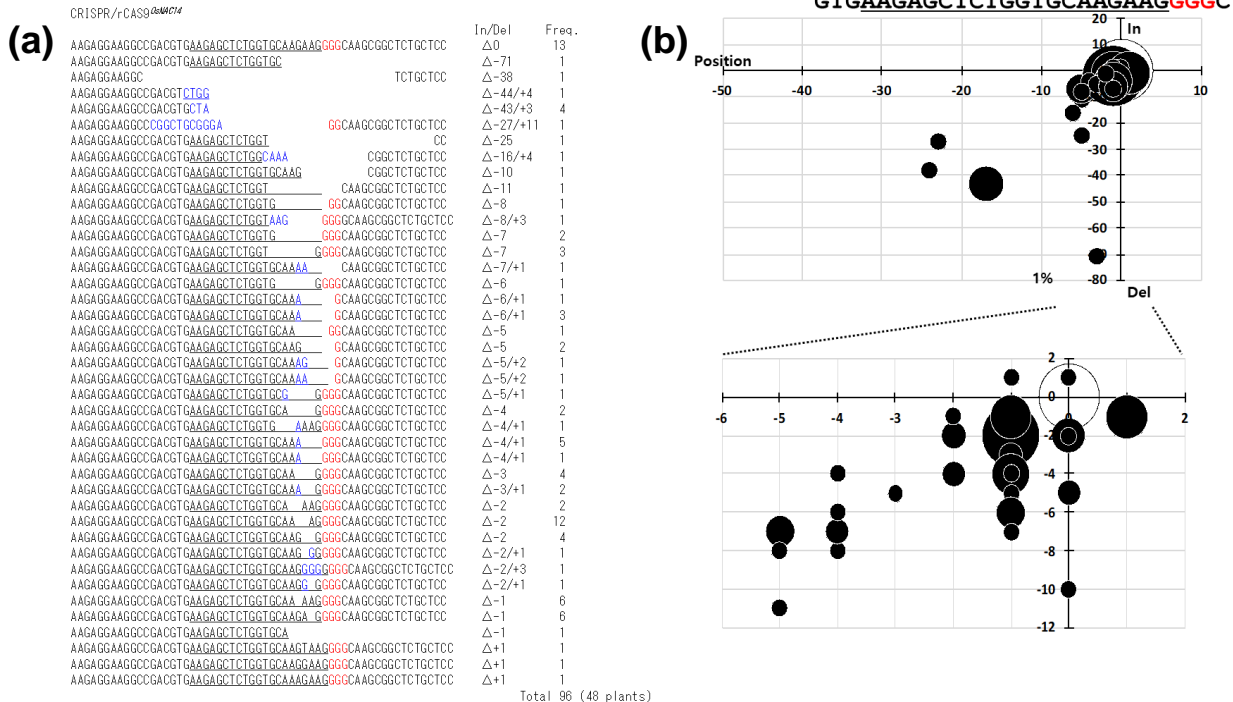

**Figure S2.** Analysis of CRISPR/rCas9-mediated base insertion and deletion (indel) patterns in CRISPR/rCas9<sup>OsNAC14</sup> transgenic plants. **a.** Indel mutation patterns and frequency. **b.** The graph showing the correlation between the degree of indel (y-axis) and the position where indel occurs (x-axis). The graph in the bottom is an enlarged image of the area where spots are concentrated. The white circle at the origin indicates the frequency of non-mutated plants.
